# Supplementary material for: Lewis acid-promoted cyclization/halogenation of allenyl ethenetricarboxylates and the corresponding amides: stereoselective synthesis of haloalkenyl five-membered heterocycles
Source: Royal Society of Chemistry journal article supplement (doi:10.1039/c4ob00233d), 2014-01-01
Supplement: c4ob00233d1.pdf [file c4ob00233d1.pdf]

## Electronic Supplementary Information

### Lewis acid-promoted Cyclization/Halogenation of Allenyl Ethenetricarboxylates and the Amides: Stereoselective Synthesis of Haloalkenyl Five-membered Heterocycles

Yugo Fukushima,<sup>b</sup> Shoko Yamazaki,\*<sup>a</sup> and Akiya Ogawa<sup>b</sup>

<sup>a</sup>*Department of Chemistry, Nara University of Education, Takabatake-cho, Nara 630-8528, Japan,* <sup>b</sup>*Department of Applied Chemistry, Graduate School of Engineering, Osaka Prefecture University, Gakuen-cho 1-1, Nakaku, Sakai, Osaka 599-8531, Japan,* <sup>c</sup>*Graduate School of Materials Science, Nara Institute of Science and Technology (NAIST), Takayama, Ikoma, Nara 630-0192, Japan*

*yamazaks@nara-edu.ac.jp*

- |                                                                                                                                                                                                             |                 |
|-------------------------------------------------------------------------------------------------------------------------------------------------------------------------------------------------------------|-----------------|
| I. B3LYP/6-31G*-optimized structures of the model compounds, <b>3m</b> + AlCl <sub>3</sub> (Schemes S1-3)                                                                                                   | Pages S2-S4     |
| II. Cartesian coordinates of the optimized geometries of Schemes 3-4, 6, S1-S3 and energies of B3LYP/6-31G* and B3LYP/6-311+G(d,p) SCRF = (PCM, solvent = CH <sub>2</sub> Cl <sub>2</sub> ) // B3LYP/6-31G* | Pages S5-S16    |
| III. <sup>1</sup> H and <sup>13</sup> C NMR spectral data                                                                                                                                                   | Pages SS1-SS26  |
| IV. 2D NOESY spectra                                                                                                                                                                                        | Pages SSS1-SSS8 |

I. B3LYP/6-31G\*-optimized structures of the model compounds, **3m** + AlCl<sub>3</sub>

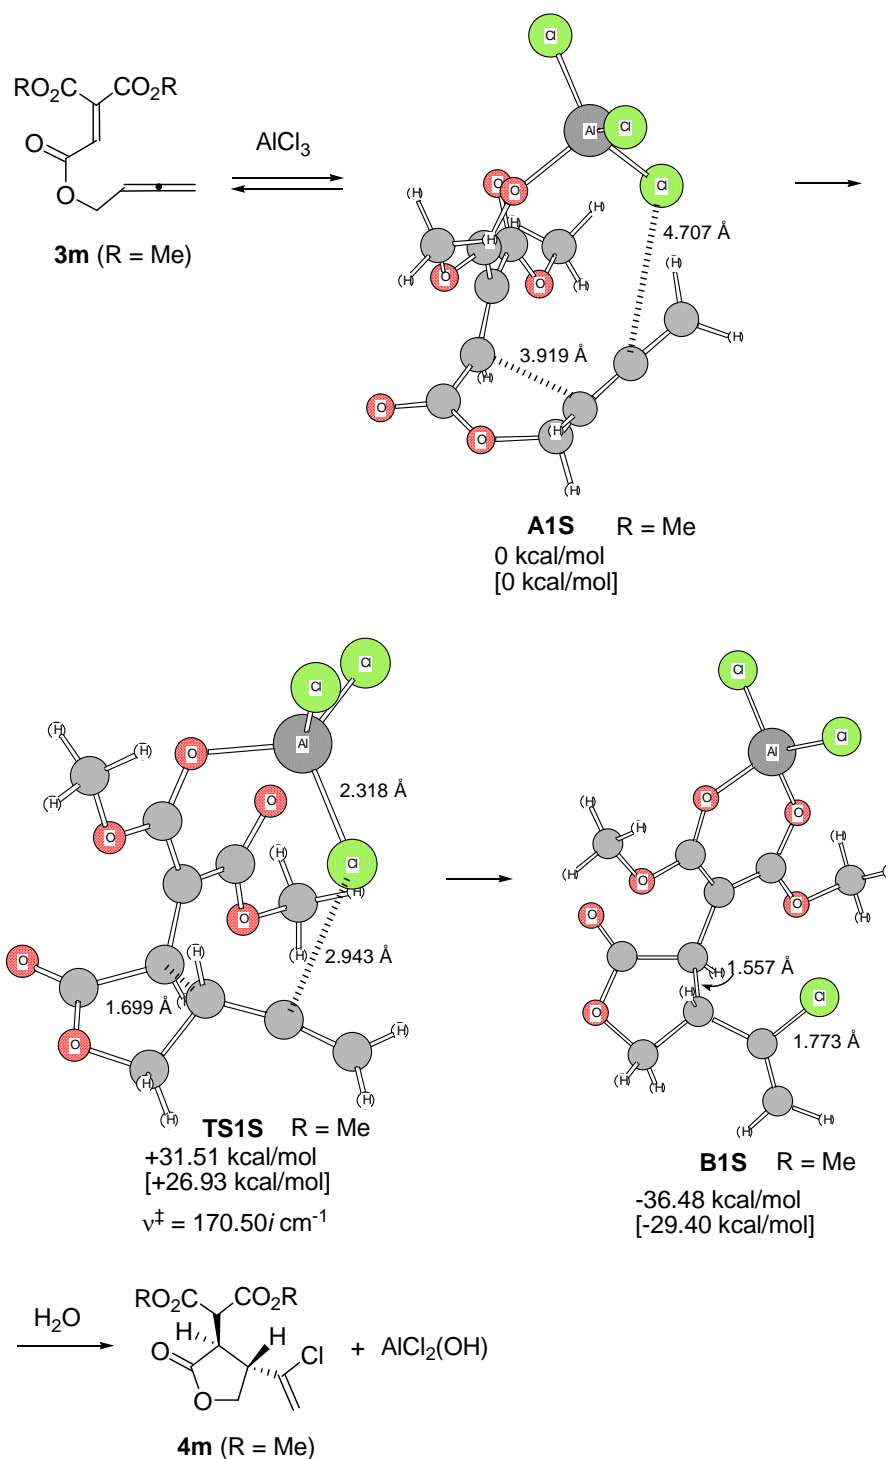

**Scheme S1.** The reaction pathway leading to 3,4-*trans* intermediate **B1S** for model compounds (**3m** + AlCl<sub>3</sub>). B3LYP/6-31G\*-optimized structures of the model compounds are shown. The Gibbs free energies  $\Delta G^\circ$  are relative to **A1S** (R = Me).  $\Delta G^\circ$  values are obtained by B3LYP/6-31G\* (without brackets) and [B3LYP/6-311+G(d,p) SCRFF = (PCM, solvent = CH<sub>2</sub>Cl<sub>2</sub>) // B3LYP/6-31G\*] (with square brackets [ ]).

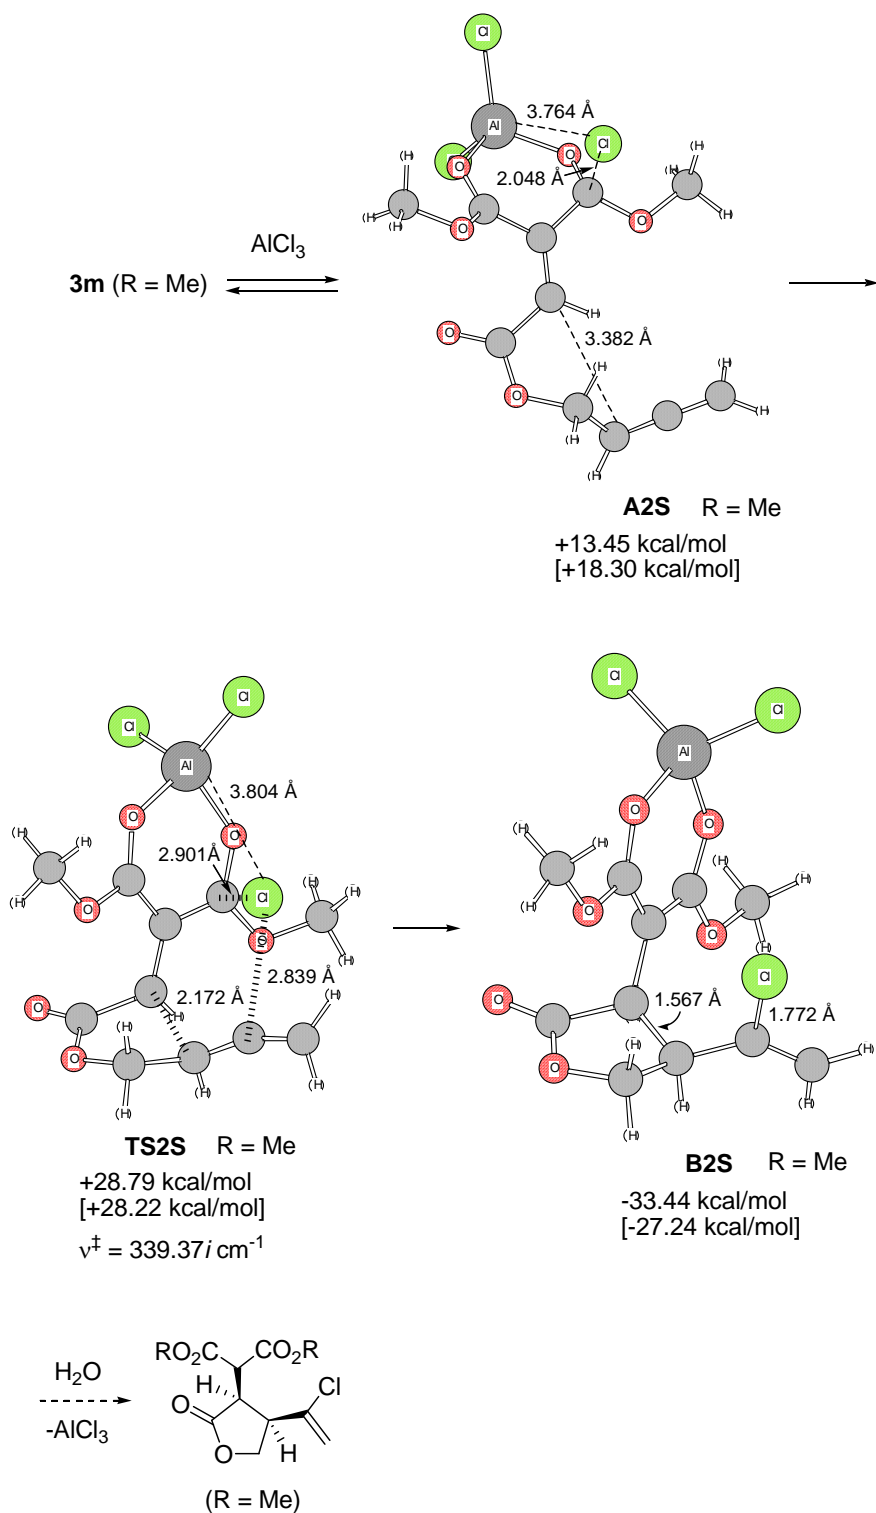

**Scheme S2.** The reaction pathway leading to 3,4-*cis* intermediate **B2S** for model compounds (**3m** + AlCl<sub>3</sub>). B3LYP/6-31G\*-optimized structures of the model compounds are shown. The Gibbs free energies are relative to **A1S** (R = Me) in Scheme S1.

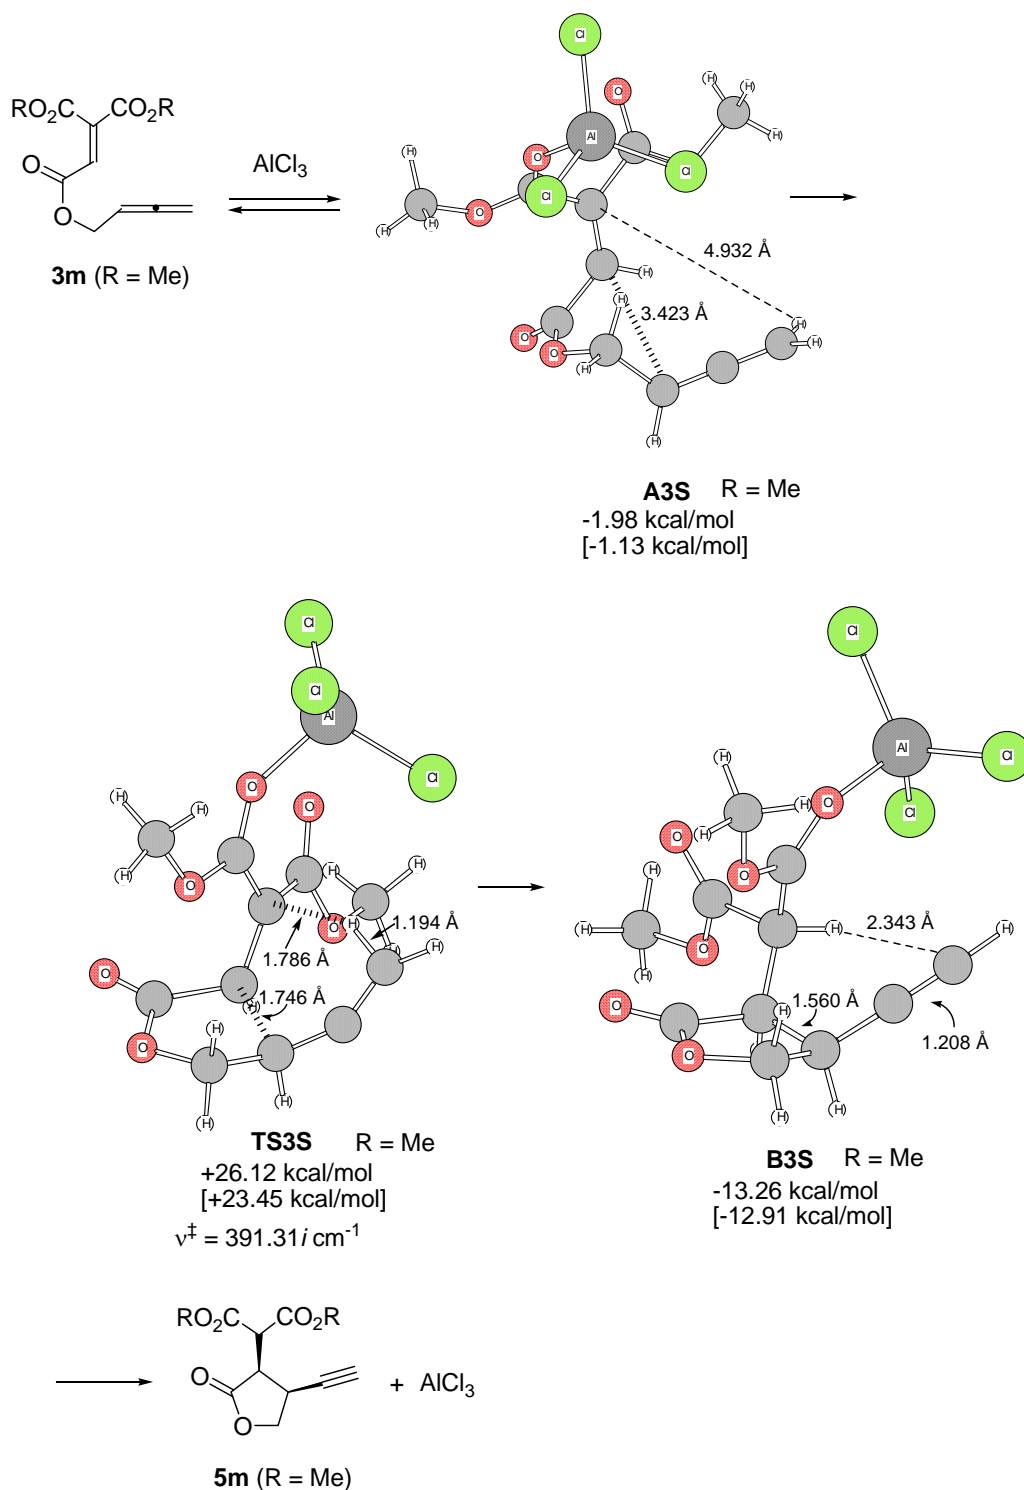

**Scheme S3.** The reaction pathway leading to 3,4-*cis* ethynyl-2-oxotetrahydrofuran **5m** for model compounds (**3m** +  $\text{AlCl}_3$ ). B3LYP/6-31G\*-optimized structures of the model compounds are shown. The Gibbs free energies are relative to **A1S** (R = Me) in Scheme S1.

II. Cartesian coordinates of the optimized geometries of Schemes 3-4, 6, S1-S3 and energies of B3LYP/6-31G\* and B3LYP/6-311+G(d,p) SCRF = (PCM, solvent = CH<sub>2</sub>Cl<sub>2</sub>) // B3LYP/6-31G\*.

Scheme 3  
A1 (Al2TS10.rev.log)

Standard orientation:

| Center Number | Atomic Number | Atomic Type | Coordinates (Angstroms) |           |           |
|---------------|---------------|-------------|-------------------------|-----------|-----------|
|               |               |             | X                       | Y         | Z         |
| 1             | 6             | 0           | -1.433303               | 0.743621  | -1.004863 |
| 2             | 6             | 0           | -1.096676               | 1.259528  | 0.330352  |
| 3             | 6             | 0           | -0.614109               | 2.526425  | 0.525093  |
| 4             | 1             | 0           | -0.419494               | 2.830185  | 1.549007  |
| 5             | 6             | 0           | -1.316461               | 0.381252  | 1.487275  |
| 6             | 6             | 0           | -0.777106               | 3.664654  | -0.459385 |
| 7             | 8             | 0           | -1.914037               | 3.989549  | -0.714744 |
| 8             | 8             | 0           | 0.272846                | 4.310507  | -0.947815 |
| 9             | 6             | 0           | 1.625234                | 4.075630  | -0.456395 |
| 10            | 1             | 0           | 1.807072                | 4.787685  | 0.353486  |
| 11            | 1             | 0           | 2.252086                | 4.344148  | -1.310023 |
| 12            | 6             | 0           | 1.891406                | 2.663362  | -0.016775 |
| 13            | 1             | 0           | 1.831791                | 1.868558  | -0.762624 |
| 14            | 6             | 0           | 2.381944                | 2.390932  | 1.179337  |
| 15            | 6             | 0           | 2.877069                | 2.122236  | 2.351361  |
| 16            | 1             | 0           | 2.244835                | 1.830093  | 3.186383  |
| 17            | 1             | 0           | 3.952262                | 2.126378  | 2.517390  |
| 18            | 8             | 0           | -1.970814               | -0.695086 | 1.442586  |
| 19            | 8             | 0           | -2.089941               | -0.313915 | -1.210009 |
| 20            | 8             | 0           | -1.021697               | 1.465944  | -1.997973 |
| 21            | 6             | 0           | -1.282238               | 1.007194  | -3.359695 |
| 22            | 1             | 0           | -0.899192               | 1.806849  | -3.989292 |
| 23            | 1             | 0           | -2.355277               | 0.870169  | -3.496697 |
| 24            | 1             | 0           | -0.735702               | 0.077209  | -3.517842 |
| 25            | 8             | 0           | -0.845401               | 0.812465  | 2.621905  |
| 26            | 6             | 0           | -0.992385               | -0.043606 | 3.795825  |
| 27            | 1             | 0           | -0.560766               | 0.535923  | 4.609086  |
| 28            | 1             | 0           | -0.435673               | -0.964986 | 3.622856  |
| 29            | 1             | 0           | -2.049517               | -0.246342 | 3.971054  |
| 30            | 13            | 0           | -2.878903               | -1.451577 | 0.017338  |
| 31            | 17            | 0           | -2.374796               | -3.448337 | -0.305817 |
| 32            | 17            | 0           | -4.901003               | -0.877816 | 0.208584  |
| 33            | 17            | 0           | 1.566590                | -0.548048 | -1.901704 |
| 34            | 13            | 0           | 2.640803                | -1.643575 | -0.314727 |
| 35            | 17            | 0           | 1.362002                | -1.435274 | 1.465362  |
| 36            | 17            | 0           | 4.508725                | -0.634782 | 0.046770  |
| 37            | 17            | 0           | 2.864070                | -3.698800 | -0.845613 |

SCF Done: E(RB+HF-LYP) = -4124.20830839 A.U. after 1 cycles  
Sum of electronic and thermal Free Energies= -4124.045838  
Thermal correction to Gibbs Free Energy= 0.162470  
After PCM corrections, the SCF energy is -4124.72302264 a.u.

TS1 (Al2TS10.log)

Standard orientation:

| Center Number | Atomic Number | Atomic Type | Coordinates (Angstroms) |          |           |
|---------------|---------------|-------------|-------------------------|----------|-----------|
|               |               |             | X                       | Y        | Z         |
| 1             | 6             | 0           | -1.479969               | 0.711270 | -0.982539 |
| 2             | 6             | 0           | -1.139983               | 1.169869 | 0.347562  |
| 3             | 6             | 0           | -0.552228               | 2.431763 | 0.561889  |
| 4             | 1             | 0           | -0.482435               | 2.727271 | 1.604630  |
| 5             | 6             | 0           | -1.368838               | 0.280747 | 1.463538  |
| 6             | 6             | 0           | -0.883414               | 3.618788 | -0.343908 |
| 7             | 8             | 0           | -2.033981               | 3.953738 | -0.459597 |
| 8             | 8             | 0           | 0.128331                | 4.272446 | -0.914706 |
| 9             | 6             | 0           | 1.467294                | 3.850134 | -0.581086 |
| 10            | 1             | 0           | 1.886006                | 4.589703 | 0.106552  |
| 11            | 1             | 0           | 2.031352                | 3.866431 | -1.516178 |
| 12            | 6             | 0           | 1.478457                | 2.457928 | 0.021634  |
| 13            | 1             | 0           | 1.419867                | 1.611795 | -0.667813 |
| 14            | 6             | 0           | 2.051523                | 2.241753 | 1.216420  |

|    |    |   |           |           |           |
|----|----|---|-----------|-----------|-----------|
| 15 | 6  | 0 | 2.561595  | 2.040130  | 2.388014  |
| 16 | 1  | 0 | 1.941512  | 1.941239  | 3.276652  |
| 17 | 1  | 0 | 3.636197  | 1.902855  | 2.498521  |
| 18 | 8  | 0 | -1.999414 | -0.816104 | 1.395184  |
| 19 | 8  | 0 | -2.137865 | -0.339871 | -1.242609 |
| 20 | 8  | 0 | -1.067962 | 1.473894  | -1.960146 |
| 21 | 6  | 0 | -1.336002 | 1.057374  | -3.330301 |
| 22 | 1  | 0 | -0.947468 | 1.869873  | -3.940574 |
| 23 | 1  | 0 | -2.410300 | 0.934901  | -3.472116 |
| 24 | 1  | 0 | -0.802929 | 0.126063  | -3.523564 |
| 25 | 8  | 0 | -0.903237 | 0.679679  | 2.623050  |
| 26 | 6  | 0 | -1.054593 | -0.216750 | 3.761213  |
| 27 | 1  | 0 | -0.641166 | 0.337074  | 4.602045  |
| 28 | 1  | 0 | -0.486837 | -1.127918 | 3.570296  |
| 29 | 1  | 0 | -2.110567 | -0.439039 | 3.919499  |
| 30 | 13 | 0 | -2.896095 | -1.525070 | -0.051857 |
| 31 | 17 | 0 | -2.355283 | -3.506114 | -0.446097 |
| 32 | 17 | 0 | -4.939757 | -1.029208 | 0.158751  |
| 33 | 17 | 0 | 1.542742  | -0.637853 | -1.895220 |
| 34 | 13 | 0 | 2.816418  | -1.455797 | -0.292231 |
| 35 | 17 | 0 | 1.548856  | -1.487509 | 1.495161  |
| 36 | 17 | 0 | 4.409801  | -0.014579 | 0.026596  |
| 37 | 17 | 0 | 3.537908  | -3.397519 | -0.789123 |

-----  
SCF Done: E(RB+HF-LYP) = -4124.20682332 A.U. after 1 cycles  
Sum of electronic and thermal Free Energies= -4124.042317  
Thermal correction to Gibbs Free Energy= 0.164507  
After PCM corrections, the SCF energy is -4124.72023186 a.u.

B1 (Al2TS10.for.log)

Standard orientation:

| Center<br>Number | Atomic<br>Number | Atomic<br>Type | Coordinates (Angstroms) |           |           |
|------------------|------------------|----------------|-------------------------|-----------|-----------|
|                  |                  |                | X                       | Y         | Z         |
| 1                | 6                | 0              | -1.620897               | 0.354555  | -1.050094 |
| 2                | 6                | 0              | -1.409670               | 0.941827  | 0.219046  |
| 3                | 6                | 0              | -0.454836               | 2.099840  | 0.373227  |
| 4                | 1                | 0              | -0.562421               | 2.498608  | 1.388488  |
| 5                | 6                | 0              | -2.190388               | 0.502057  | 1.302632  |
| 6                | 6                | 0              | -0.778455               | 3.290529  | -0.552817 |
| 7                | 8                | 0              | -1.857477               | 3.652258  | -0.931049 |
| 8                | 8                | 0              | 0.375969                | 3.933448  | -0.882268 |
| 9                | 6                | 0              | 1.511114                | 3.307960  | -0.264170 |
| 10               | 1                | 0              | 1.785388                | 3.873741  | 0.634698  |
| 11               | 1                | 0              | 2.338255                | 3.338502  | -0.975338 |
| 12               | 6                | 0              | 1.048063                | 1.871817  | 0.084101  |
| 13               | 1                | 0              | 1.142753                | 1.252754  | -0.813958 |
| 14               | 6                | 0              | 1.831077                | 1.228936  | 1.184292  |
| 15               | 6                | 0              | 1.478466                | 0.808244  | 2.391174  |
| 16               | 1                | 0              | 0.446357                | 0.907951  | 2.711653  |
| 17               | 1                | 0              | 2.179904                | 0.341895  | 3.072789  |
| 18               | 8                | 0              | -3.087458               | -0.418550 | 1.273153  |
| 19               | 8                | 0              | -2.449568               | -0.585930 | -1.328152 |
| 20               | 8                | 0              | -0.879067               | 0.828934  | -2.040156 |
| 21               | 6                | 0              | -1.077458               | 0.290937  | -3.369187 |
| 22               | 1                | 0              | -0.381304               | 0.845113  | -3.996646 |
| 23               | 1                | 0              | -2.106908               | 0.457948  | -3.690493 |
| 24               | 1                | 0              | -0.845366               | -0.775342 | -3.379989 |
| 25               | 8                | 0              | -1.977937               | 1.093148  | 2.482112  |
| 26               | 6                | 0              | -2.819661               | 0.705790  | 3.592383  |
| 27               | 1                | 0              | -2.482382               | 1.323778  | 4.423775  |
| 28               | 1                | 0              | -2.688898               | -0.354106 | 3.818674  |
| 29               | 1                | 0              | -3.866940               | 0.909198  | 3.361430  |
| 30               | 13               | 0              | -3.618020               | -1.383021 | -0.179512 |
| 31               | 17               | 0              | -3.137201               | -3.425613 | 0.081848  |
| 32               | 17               | 0              | -5.614050               | -0.908266 | -0.693557 |
| 33               | 17               | 0              | 2.365328                | -1.285666 | -1.731053 |
| 34               | 13               | 0              | 3.812090                | -1.325395 | -0.179795 |
| 35               | 17               | 0              | 3.337300                | -2.467947 | 1.531014  |
| 36               | 17               | 0              | 3.586969                | 1.002804  | 0.725360  |
| 37               | 17               | 0              | 5.839231                | -1.141902 | -0.733418 |

-----  
SCF Done: E(RB+HF-LYP) = -4124.25611120 A.U. after 1 cycles  
Sum of electronic and thermal Free Energies= -4124.085941  
Thermal correction to Gibbs Free Energy= 0.170170  
After PCM corrections, the SCF energy is -4124.75668199 a.u.

Scheme 4

A2 (Al2TS12.for.log)

Standard orientation:

| Center Number | Atomic Number | Atomic Type | Coordinates (Angstroms) |           |           |
|---------------|---------------|-------------|-------------------------|-----------|-----------|
|               |               |             | X                       | Y         | Z         |
| 1             | 6             | 0           | 1.259689                | -0.448599 | -1.224475 |
| 2             | 6             | 0           | 0.570974                | -1.019841 | -0.038375 |
| 3             | 6             | 0           | -0.436439               | -1.915793 | -0.123158 |
| 4             | 1             | 0           | -0.909435               | -2.244427 | 0.799106  |
| 5             | 6             | 0           | 1.059301                | -0.566550 | 1.283687  |
| 6             | 6             | 0           | -0.828682               | -2.642124 | -1.388736 |
| 7             | 8             | 0           | 0.039022                | -3.180472 | -2.040124 |
| 8             | 8             | 0           | -2.113203               | -2.729537 | -1.707759 |
| 9             | 6             | 0           | -3.160040               | -2.164013 | -0.849314 |
| 10            | 1             | 0           | -3.939025               | -1.882952 | -1.560192 |
| 11            | 1             | 0           | -2.812785               | -1.254978 | -0.353870 |
| 12            | 6             | 0           | -3.644586               | -3.208610 | 0.117767  |
| 13            | 1             | 0           | -4.076237               | -4.109938 | -0.317934 |
| 14            | 6             | 0           | -3.593043               | -3.077206 | 1.421165  |
| 15            | 6             | 0           | -3.566118               | -2.945091 | 2.719907  |
| 16            | 1             | 0           | -4.383860               | -2.468772 | 3.256433  |
| 17            | 1             | 0           | -2.728153               | -3.303099 | 3.314865  |
| 18            | 8             | 0           | 2.225563                | -0.128156 | 1.479595  |
| 19            | 8             | 0           | 2.466888                | -0.080861 | -1.211011 |
| 20            | 8             | 0           | 0.533190                | -0.342253 | -2.277651 |
| 21            | 6             | 0           | 1.087515                | 0.270176  | -3.480696 |
| 22            | 1             | 0           | 1.874417                | -0.374033 | -3.875437 |
| 23            | 1             | 0           | 1.471342                | 1.258343  | -3.226276 |
| 24            | 1             | 0           | 0.239698                | 0.336769  | -4.157291 |
| 25            | 8             | 0           | 0.220164                | -0.693764 | 2.257001  |
| 26            | 6             | 0           | 0.576527                | -0.168885 | 3.571692  |
| 27            | 1             | 0           | -0.312188               | -0.336191 | 4.174945  |
| 28            | 1             | 0           | 0.790768                | 0.895732  | 3.474151  |
| 29            | 1             | 0           | 1.440071                | -0.711451 | 3.959132  |
| 30            | 13            | 0           | 3.608035                | 0.003718  | 0.245431  |
| 31            | 17            | 0           | 4.565482                | 1.857615  | 0.359476  |
| 32            | 17            | 0           | 0.240346                | 2.261677  | 0.152167  |
| 33            | 17            | 0           | 4.714087                | -1.786036 | 0.345570  |
| 34            | 13            | 0           | -1.963995               | 2.243353  | -0.065105 |
| 35            | 17            | 0           | -2.733075               | 4.221221  | 0.122578  |
| 36            | 17            | 0           | -2.694321               | 0.904920  | 1.490064  |
| 37            | 17            | 0           | -2.383737               | 1.337228  | -1.992740 |

SCF Done: E(RB+HF-LYP) = -4124.21623445 A.U. after 1 cycles  
 Sum of electronic and thermal Free Energies= -4124.054051  
 Thermal correction to Gibbs Free Energy= 0.162184  
 After PCM corrections, the SCF energy is -4124.72478315 a.u.

TS2 (Al2TS12.log)

Standard orientation:

| Center Number | Atomic Number | Atomic Type | Coordinates (Angstroms) |           |           |
|---------------|---------------|-------------|-------------------------|-----------|-----------|
|               |               |             | X                       | Y         | Z         |
| 1             | 6             | 0           | -1.529381               | 0.423685  | -1.051320 |
| 2             | 6             | 0           | -1.662647               | 1.151669  | 0.196175  |
| 3             | 6             | 0           | -1.101293               | 2.437633  | 0.388149  |
| 4             | 1             | 0           | -1.475775               | 2.963743  | 1.259339  |
| 5             | 6             | 0           | -2.425608               | 0.555148  | 1.262359  |
| 6             | 6             | 0           | -0.847982               | 3.374604  | -0.795000 |
| 7             | 8             | 0           | -1.802952               | 3.911234  | -1.296990 |
| 8             | 8             | 0           | 0.412421                | 3.587888  | -1.156643 |
| 9             | 6             | 0           | 1.399607                | 2.805784  | -0.437987 |
| 10            | 1             | 0           | 2.328229                | 3.373913  | -0.496554 |
| 11            | 1             | 0           | 1.534187                | 1.837257  | -0.920488 |
| 12            | 6             | 0           | 0.938812                | 2.670364  | 0.998872  |
| 13            | 1             | 0           | 0.836279                | 3.613511  | 1.540857  |
| 14            | 6             | 0           | 1.096183                | 1.552605  | 1.725020  |
| 15            | 6             | 0           | 1.139572                | 0.445615  | 2.386835  |
| 16            | 1             | 0           | 2.083179                | 0.020010  | 2.734687  |
| 17            | 1             | 0           | 0.242599                | -0.152526 | 2.547767  |
| 18            | 8             | 0           | -3.075422               | -0.532576 | 1.184231  |
| 19            | 8             | 0           | -2.091582               | -0.685638 | -1.303563 |
| 20            | 8             | 0           | -0.792786               | 0.994062  | -1.960334 |
| 21            | 6             | 0           | -0.597484               | 0.329809  | -3.247590 |
| 22            | 1             | 0           | -1.568499               | 0.112703  | -3.693283 |
| 23            | 1             | 0           | -0.014352               | -0.576741 | -3.086377 |
| 24            | 1             | 0           | -0.041493               | 1.054507  | -3.838034 |
| 25            | 8             | 0           | -2.434356               | 1.214090  | 2.403327  |

|    |    |   |           |           |           |
|----|----|---|-----------|-----------|-----------|
| 26 | 6  | 0 | -3.234770 | 0.686520  | 3.497397  |
| 27 | 1  | 0 | -3.085813 | 1.394396  | 4.310432  |
| 28 | 1  | 0 | -2.878871 | -0.307660 | 3.771961  |
| 29 | 1  | 0 | -4.283850 | 0.643517  | 3.200713  |
| 30 | 13 | 0 | -3.283663 | -1.640877 | -0.281920 |
| 31 | 17 | 0 | -2.579686 | -3.558783 | 0.177185  |
| 32 | 17 | 0 | 1.786765  | -1.005973 | -0.997314 |
| 33 | 17 | 0 | -5.223748 | -1.368904 | -1.056217 |
| 34 | 13 | 0 | 3.769827  | -0.969766 | -0.030716 |
| 35 | 17 | 0 | 5.237549  | -1.812768 | -1.330463 |
| 36 | 17 | 0 | 3.594609  | -2.006836 | 1.866936  |
| 37 | 17 | 0 | 4.198123  | 1.132596  | 0.412554  |

-----  
SCF Done: E(RB+HF-LYP) = -4124.19956852 A.U. after 1 cycles  
Sum of electronic and thermal Free Energies= -4124.034410  
Thermal correction to Gibbs Free Energy= 0.165158  
After PCM corrections, the SCF energy is -4124.71607915 a.u.

B2 (Al2TS12.rev.log)

Standard orientation:

| Center<br>Number | Atomic<br>Number | Atomic<br>Type | Coordinates (Angstroms) |           |           |
|------------------|------------------|----------------|-------------------------|-----------|-----------|
|                  |                  |                | X                       | Y         | Z         |
| 1                | 6                | 0              | -1.542756               | 0.193251  | -0.894828 |
| 2                | 6                | 0              | -1.621113               | 0.997269  | 0.263998  |
| 3                | 6                | 0              | -0.707861               | 2.193166  | 0.461953  |
| 4                | 1                | 0              | -1.122537               | 2.748273  | 1.303510  |
| 5                | 6                | 0              | -2.683081               | 0.775035  | 1.166804  |
| 6                | 6                | 0              | -0.783878               | 3.154155  | -0.747932 |
| 7                | 8                | 0              | -1.775626               | 3.677201  | -1.176869 |
| 8                | 8                | 0              | 0.449313                | 3.365865  | -1.272310 |
| 9                | 6                | 0              | 1.433552                | 2.506140  | -0.684957 |
| 10               | 1                | 0              | 2.351858                | 3.085029  | -0.575360 |
| 11               | 1                | 0              | 1.611919                | 1.659439  | -1.350694 |
| 12               | 6                | 0              | 0.838256                | 2.064015  | 0.678936  |
| 13               | 1                | 0              | 1.099824                | 2.851234  | 1.399864  |
| 14               | 6                | 0              | 1.410112                | 0.790297  | 1.227008  |
| 15               | 6                | 0              | 0.869946                | -0.289605 | 1.771292  |
| 16               | 1                | 0              | 1.463193                | -1.103946 | 2.170364  |
| 17               | 1                | 0              | -0.208861               | -0.379559 | 1.807002  |
| 18               | 8                | 0              | -3.584971               | -0.137215 | 1.066629  |
| 19               | 8                | 0              | -2.307327               | -0.793702 | -1.196988 |
| 20               | 8                | 0              | -0.573280               | 0.498045  | -1.743893 |
| 21               | 6                | 0              | -0.468125               | -0.258968 | -2.975298 |
| 22               | 1                | 0              | -1.389283               | -0.161161 | -3.551937 |
| 23               | 1                | 0              | -0.267797               | -1.307956 | -2.752980 |
| 24               | 1                | 0              | 0.371456                | 0.189333  | -3.503129 |
| 25               | 8                | 0              | -2.751623               | 1.574290  | 2.227091  |
| 26               | 6                | 0              | -3.861188               | 1.404696  | 3.137458  |
| 27               | 1                | 0              | -3.710533               | 2.166848  | 3.900924  |
| 28               | 1                | 0              | -3.843144               | 0.406029  | 3.578129  |
| 29               | 1                | 0              | -4.806666               | 1.563014  | 2.615215  |
| 30               | 13               | 0              | -3.725163               | -1.407408 | -0.230969 |
| 31               | 17               | 0              | -3.281832               | -3.309741 | 0.587099  |
| 32               | 17               | 0              | 3.202112                | -0.836617 | -1.922306 |
| 33               | 17               | 0              | -5.528071               | -1.193409 | -1.310053 |
| 34               | 13               | 0              | 4.234644                | -1.020472 | -0.079424 |
| 35               | 17               | 0              | 6.213886                | -0.298583 | 0.012672  |
| 36               | 17               | 0              | 3.725783                | -2.689303 | 1.113616  |
| 37               | 17               | 0              | 3.248842                | 0.868435  | 1.244756  |

-----  
SCF Done: E(RB+HF-LYP) = -4124.24632134 A.U. after 1 cycles  
Sum of electronic and thermal Free Energies= -4124.076156  
Thermal correction to Gibbs Free Energy= 0.170165  
After PCM corrections, the SCF energy is -4124.74713666 a.u.

Scheme 6

3m s-cis (Enallene14.log)

Standard orientation:

| Center<br>Number | Atomic<br>Number | Atomic<br>Type | Coordinates (Angstroms) |           |           |
|------------------|------------------|----------------|-------------------------|-----------|-----------|
|                  |                  |                | X                       | Y         | Z         |
| 1                | 6                | 0              | 1.631565                | 1.084517  | 0.306173  |
| 2                | 6                | 0              | 1.364367                | -0.393478 | 0.157450  |
| 3                | 6                | 0              | 0.159932                | -0.957732 | 0.329129  |
| 4                | 1                | 0              | 0.066114                | -2.036776 | 0.261582  |
| 5                | 6                | 0              | 2.530151                | -1.291991 | -0.130743 |



|    |   |   |           |           |           |
|----|---|---|-----------|-----------|-----------|
| 6  | 6 | 0 | -1.064504 | -0.170481 | 0.615855  |
| 7  | 8 | 0 | -1.113693 | 1.039775  | 0.730522  |
| 8  | 8 | 0 | -2.128532 | -0.990104 | 0.737782  |
| 9  | 6 | 0 | -3.397436 | -0.348896 | 1.044223  |
| 10 | 1 | 0 | -3.215826 | 0.412723  | 1.807810  |
| 11 | 1 | 0 | -4.015765 | -1.149458 | 1.450280  |
| 12 | 6 | 0 | -4.028626 | 0.263220  | -0.178985 |
| 13 | 1 | 0 | -3.522179 | 1.125974  | -0.608516 |
| 14 | 6 | 0 | -5.135323 | -0.189806 | -0.712317 |
| 15 | 6 | 0 | -6.246580 | -0.641730 | -1.229051 |
| 16 | 1 | 0 | -7.217779 | -0.272722 | -0.904805 |
| 17 | 1 | 0 | -6.243300 | -1.402001 | -2.007753 |
| 18 | 8 | 0 | 2.470914  | -2.502057 | -0.186189 |
| 19 | 8 | 0 | 2.051573  | 1.578874  | 1.325883  |
| 20 | 8 | 0 | 1.393669  | 1.740457  | -0.838252 |
| 21 | 6 | 0 | 1.574401  | 3.166894  | -0.769573 |
| 22 | 1 | 0 | 1.370504  | 3.533736  | -1.775618 |
| 23 | 1 | 0 | 2.596229  | 3.409928  | -0.467717 |
| 24 | 1 | 0 | 0.870881  | 3.595826  | -0.051769 |
| 25 | 8 | 0 | 3.651475  | -0.577520 | -0.335742 |
| 26 | 6 | 0 | 4.833235  | -1.347211 | -0.617926 |
| 27 | 1 | 0 | 5.632006  | -0.616580 | -0.742888 |
| 28 | 1 | 0 | 4.696173  | -1.932953 | -1.530529 |
| 29 | 1 | 0 | 5.052586  | -2.022928 | 0.212475  |

-----  
SCF Done: E(RB+HF-LYP) = -877.673032811 A.U. after 1 cycles  
Sum of electronic and thermal Free Energies= -877.503361  
Thermal correction to Gibbs Free Energy= 0.169672  
After PCM corrections, the SCF energy is -877.959594148 a.u.

3m s-trans (Enallene15.log)

Standard orientation:

| -----            |                  |                |                         |           |           |
|------------------|------------------|----------------|-------------------------|-----------|-----------|
| Center<br>Number | Atomic<br>Number | Atomic<br>Type | Coordinates (Angstroms) |           |           |
|                  |                  |                | X                       | Y         | Z         |
| -----            |                  |                |                         |           |           |
| 1                | 6                | 0              | 1.665064                | -1.037959 | -0.265356 |
| 2                | 6                | 0              | 0.795984                | 0.196024  | -0.232348 |
| 3                | 6                | 0              | -0.539544               | 0.177331  | -0.359527 |
| 4                | 1                | 0              | -1.056194               | 1.130646  | -0.364237 |
| 5                | 6                | 0              | 1.470837                | 1.530618  | -0.121987 |
| 6                | 6                | 0              | -1.306059               | -1.099600 | -0.444321 |
| 7                | 8                | 0              | -0.831697               | -2.171535 | -0.140568 |
| 8                | 8                | 0              | -2.592964               | -1.055105 | -0.874150 |
| 9                | 6                | 0              | -3.190900               | 0.141349  | -1.381368 |
| 10               | 1                | 0              | -3.987081               | -0.209678 | -2.046673 |
| 11               | 1                | 0              | -2.477884               | 0.699228  | -2.002859 |
| 12               | 6                | 0              | -3.776497               | 1.026128  | -0.304854 |
| 13               | 1                | 0              | -4.307661               | 1.907468  | -0.667655 |
| 14               | 6                | 0              | -3.696553               | 0.795955  | 0.980811  |
| 15               | 6                | 0              | -3.613379               | 0.565385  | 2.263525  |
| 16               | 1                | 0              | -2.790197               | 0.953203  | 2.860554  |
| 17               | 1                | 0              | -4.362235               | -0.028124 | 2.784444  |
| 18               | 8                | 0              | 0.894210                | 2.598399  | -0.132646 |
| 19               | 8                | 0              | 2.080099                | -1.527253 | -1.289870 |
| 20               | 8                | 0              | 1.948714                | -1.460280 | 0.973224  |
| 21               | 6                | 0              | 2.736486                | -2.663397 | 1.040391  |
| 22               | 1                | 0              | 2.883095                | -2.854485 | 2.103453  |
| 23               | 1                | 0              | 3.695572                | -2.522103 | 0.535668  |
| 24               | 1                | 0              | 2.195151                | -3.488210 | 0.570830  |
| 25               | 8                | 0              | 2.803463                | 1.390863  | -0.007232 |
| 26               | 6                | 0              | 3.549495                | 2.616220  | 0.096603  |
| 27               | 1                | 0              | 4.593911                | 2.314271  | 0.170290  |
| 28               | 1                | 0              | 3.242870                | 3.173181  | 0.985643  |
| 29               | 1                | 0              | 3.386451                | 3.235560  | -0.788937 |

-----  
SCF Done: E(RB+HF-LYP) = -877.658439823 A.U. after 1 cycles  
Sum of electronic and thermal Free Energies= -877.489050  
Thermal correction to Gibbs Free Energy= 0.169390  
After PCM corrections, the SCF energy is -877.947095204 a.u.

11m s-cis (Nal4.log)

Standard orientation:

| -----            |                  |                |                         |           |          |
|------------------|------------------|----------------|-------------------------|-----------|----------|
| Center<br>Number | Atomic<br>Number | Atomic<br>Type | Coordinates (Angstroms) |           |          |
|                  |                  |                | X                       | Y         | Z        |
| -----            |                  |                |                         |           |          |
| 1                | 6                | 0              | 1.758547                | 1.183998  | 0.289774 |
| 2                | 6                | 0              | 1.582961                | -0.307297 | 0.153285 |

|    |   |   |           |           |           |
|----|---|---|-----------|-----------|-----------|
| 3  | 6 | 0 | 0.418880  | -0.949231 | 0.337209  |
| 4  | 1 | 0 | 0.444578  | -2.032844 | 0.288059  |
| 5  | 6 | 0 | 2.797882  | -1.137630 | -0.131856 |
| 6  | 6 | 0 | -0.849056 | -0.233451 | 0.669457  |
| 7  | 8 | 0 | -0.831027 | 0.929766  | 1.077996  |
| 8  | 7 | 0 | -2.022069 | -0.936242 | 0.554204  |
| 9  | 6 | 0 | -3.253677 | -0.266876 | 0.990736  |
| 10 | 1 | 0 | -2.984038 | 0.399654  | 1.812738  |
| 11 | 1 | 0 | -3.943060 | -1.031443 | 1.361880  |
| 12 | 6 | 0 | -3.901555 | 0.532938  | -0.122994 |
| 13 | 1 | 0 | -3.320530 | 1.374053  | -0.500251 |
| 14 | 6 | 0 | -5.077127 | 0.263264  | -0.631592 |
| 15 | 6 | 0 | -6.261194 | -0.003434 | -1.118205 |
| 16 | 1 | 0 | -7.162102 | 0.441164  | -0.699103 |
| 17 | 1 | 0 | -6.394818 | -0.673196 | -1.965707 |
| 18 | 8 | 0 | 2.816729  | -2.351982 | -0.138063 |
| 19 | 8 | 0 | 2.317447  | 1.696414  | 1.230783  |
| 20 | 8 | 0 | 1.279545  | 1.838522  | -0.780581 |
| 21 | 6 | 0 | 1.329153  | 3.272411  | -0.681607 |
| 22 | 1 | 0 | 0.946474  | 3.643477  | -1.632803 |
| 23 | 1 | 0 | 2.354825  | 3.612389  | -0.517689 |
| 24 | 1 | 0 | 0.698150  | 3.607062  | 0.145683  |
| 25 | 8 | 0 | 3.864106  | -0.366893 | -0.410270 |
| 26 | 6 | 0 | 5.081567  | -1.074323 | -0.698694 |
| 27 | 1 | 0 | 5.826005  | -0.302563 | -0.893302 |
| 28 | 1 | 0 | 4.951137  | -1.717411 | -1.573031 |
| 29 | 1 | 0 | 5.375703  | -1.688042 | 0.156484  |
| 30 | 6 | 0 | -2.199587 | -2.194449 | -0.160386 |
| 31 | 1 | 0 | -2.442585 | -3.013736 | 0.528978  |
| 32 | 1 | 0 | -1.307122 | -2.459902 | -0.725603 |
| 33 | 1 | 0 | -3.023305 | -2.087111 | -0.875435 |

-----  
SCF Done: E(RB+HF-LYP) = -897.114649212 A.U. after 2 cycles  
Sum of electronic and thermal Free Energies= -896.906343  
Thermal correction to Gibbs Free Energy= 0.208307  
After PCM corrections, the SCF energy is -897.404540283 a.u.

11m s-trans (Nall.log)

Standard orientation:

| Center<br>Number | Atomic<br>Number | Atomic<br>Type | Coordinates (Angstroms) |           |           |
|------------------|------------------|----------------|-------------------------|-----------|-----------|
|                  |                  |                | X                       | Y         | Z         |
| 1                | 6                | 0              | -1.813308               | 1.092744  | -0.208946 |
| 2                | 6                | 0              | -1.067783               | -0.219518 | -0.197071 |
| 3                | 6                | 0              | 0.267786                | -0.318690 | -0.269518 |
| 4                | 1                | 0              | 0.691866                | -1.317377 | -0.288837 |
| 5                | 6                | 0              | -1.865370               | -1.485771 | -0.169378 |
| 6                | 6                | 0              | 1.156589                | 0.884078  | -0.252959 |
| 7                | 8                | 0              | 0.743471                | 1.963923  | 0.168842  |
| 8                | 7                | 0              | 2.442415                | 0.711945  | -0.704399 |
| 9                | 6                | 0              | 2.945092                | -0.512688 | -1.310342 |
| 10               | 1                | 0              | 3.688717                | -0.226509 | -2.065685 |
| 11               | 1                | 0              | 2.142938                | -1.009808 | -1.867097 |
| 12               | 6                | 0              | 3.582352                | -1.495521 | -0.340375 |
| 13               | 1                | 0              | 4.068035                | -2.358380 | -0.799189 |
| 14               | 6                | 0              | 3.570684                | -1.381595 | 0.963375  |
| 15               | 6                | 0              | 3.560631                | -1.262726 | 2.264550  |
| 16               | 1                | 0              | 4.354076                | -0.741446 | 2.797068  |
| 17               | 6                | 0              | 3.383733                | 1.819550  | -0.586553 |
| 18               | 8                | 0              | -1.392699               | -2.604247 | -0.182983 |
| 19               | 8                | 0              | -2.095216               | 1.692422  | -1.220608 |
| 20               | 8                | 0              | -2.170888               | 1.453787  | 1.032194  |
| 21               | 6                | 0              | -2.849155               | 2.718014  | 1.123623  |
| 22               | 1                | 0              | -3.078177               | 2.849187  | 2.181498  |
| 23               | 1                | 0              | -3.765546               | 2.707325  | 0.527690  |
| 24               | 1                | 0              | -2.194399               | 3.517993  | 0.769125  |
| 25               | 8                | 0              | -3.186951               | -1.228397 | -0.130219 |
| 26               | 6                | 0              | -4.041571               | -2.383545 | -0.108795 |
| 27               | 1                | 0              | -5.058466               | -1.992140 | -0.084615 |
| 28               | 1                | 0              | -3.838967               | -2.990534 | 0.777404  |
| 29               | 1                | 0              | -3.882136               | -2.991773 | -1.002867 |
| 30               | 1                | 0              | 4.293335                | 1.484011  | -0.076139 |
| 31               | 1                | 0              | 2.909367                | 2.613701  | -0.012203 |
| 32               | 1                | 0              | 3.655623                | 2.205983  | -1.577378 |
| 33               | 1                | 0              | 2.757012                | -1.679748 | 2.868545  |

-----  
SCF Done: E(RB+HF-LYP) = -897.113080326 A.U. after 1 cycles  
Sum of electronic and thermal Free Energies= -896.904877  
Thermal correction to Gibbs Free Energy= 0.208203

After PCM corrections, the SCF energy is -897.404538646 a.u.

Scheme S1

AlS (AlTS5.rev.log)

Standard orientation:

| Center Number | Atomic Number | Atomic Type | Coordinates (Angstroms) |           |           |
|---------------|---------------|-------------|-------------------------|-----------|-----------|
|               |               |             | X                       | Y         | Z         |
| 1             | 6             | 0           | 0.410271                | 0.117635  | -1.107207 |
| 2             | 6             | 0           | 0.944589                | 1.285333  | -0.370750 |
| 3             | 6             | 0           | 2.260552                | 1.453287  | -0.127542 |
| 4             | 1             | 0           | 2.544775                | 2.336035  | 0.441410  |
| 5             | 6             | 0           | -0.051644               | 2.339633  | 0.025402  |
| 6             | 6             | 0           | 3.426716                | 0.687794  | -0.696953 |
| 7             | 8             | 0           | 3.918970                | 1.099246  | -1.719536 |
| 8             | 8             | 0           | 3.953008                | -0.346227 | -0.033387 |
| 9             | 6             | 0           | 3.428802                | -0.816458 | 1.239769  |
| 10            | 1             | 0           | 2.663225                | -0.139498 | 1.628241  |
| 11            | 1             | 0           | 4.292639                | -0.792361 | 1.912289  |
| 12            | 6             | 0           | 2.898313                | -2.216200 | 1.091274  |
| 13            | 1             | 0           | 3.545606                | -2.917391 | 0.564001  |
| 14            | 6             | 0           | 1.773316                | -2.624828 | 1.627479  |
| 15            | 6             | 0           | 0.668733                | -3.039032 | 2.186114  |
| 16            | 1             | 0           | 0.664235                | -3.406106 | 3.211033  |
| 17            | 1             | 0           | -0.284172               | -3.030675 | 1.660189  |
| 18            | 8             | 0           | -1.091837               | 2.515161  | -0.567791 |
| 19            | 8             | 0           | -0.761812               | -0.293158 | -1.041915 |
| 20            | 8             | 0           | 1.287712                | -0.498965 | -1.856658 |
| 21            | 6             | 0           | 0.872896                | -1.716384 | -2.540329 |
| 22            | 1             | 0           | 1.775546                | -2.071564 | -3.032803 |
| 23            | 1             | 0           | 0.094720                | -1.473802 | -3.265442 |
| 24            | 1             | 0           | 0.499964                | -2.437443 | -1.811876 |
| 25            | 8             | 0           | 0.381985                | 3.074889  | 1.057539  |
| 26            | 6             | 0           | -0.521551               | 4.118546  | 1.486455  |
| 27            | 1             | 0           | -0.019018               | 4.606304  | 2.320962  |
| 28            | 1             | 0           | -1.467773               | 3.675814  | 1.803622  |
| 29            | 1             | 0           | -0.699761               | 4.823330  | 0.671238  |
| 30            | 13            | 0           | -2.362113               | -0.520497 | -0.060396 |
| 31            | 17            | 0           | -1.943061               | 0.251881  | 1.895235  |
| 32            | 17            | 0           | -2.449932               | -2.668309 | -0.060174 |
| 33            | 17            | 0           | -3.905400               | 0.395857  | -1.182472 |

SCF Done: E(RB+HF-LYP) = -2500.93736279 A.U. after 1 cycles  
Sum of electronic and thermal Free Energies= -2500.772050  
Thermal correction to Gibbs Free Energy= 0.165313  
After PCM corrections, the SCF energy is -2501.33648913 a.u.

TS1S (AlTS5.log)

Standard orientation:

| Center Number | Atomic Number | Atomic Type | Coordinates (Angstroms) |           |           |
|---------------|---------------|-------------|-------------------------|-----------|-----------|
|               |               |             | X                       | Y         | Z         |
| 1             | 6             | 0           | 0.170937                | -1.108660 | -0.882808 |
| 2             | 6             | 0           | 0.765601                | 0.187070  | -0.857595 |
| 3             | 6             | 0           | 2.117433                | 0.407168  | -0.391141 |
| 4             | 1             | 0           | 2.371053                | 1.469709  | -0.451789 |
| 5             | 6             | 0           | -0.117207               | 1.299718  | -1.085640 |
| 6             | 6             | 0           | 3.272373                | -0.366276 | -1.059776 |
| 7             | 8             | 0           | 3.363784                | -0.623732 | -2.223071 |
| 8             | 8             | 0           | 4.244864                | -0.662055 | -0.153203 |
| 9             | 6             | 0           | 3.936746                | -0.166973 | 1.142306  |
| 10            | 1             | 0           | 4.416195                | 0.805948  | 1.296762  |
| 11            | 1             | 0           | 4.310464                | -0.885980 | 1.873012  |
| 12            | 6             | 0           | 2.385072                | -0.049739 | 1.223541  |
| 13            | 1             | 0           | 1.919031                | -1.032497 | 1.339106  |
| 14            | 6             | 0           | 1.948276                | 0.859595  | 2.182407  |
| 15            | 6             | 0           | 1.772005                | 1.710014  | 3.138825  |
| 16            | 1             | 0           | 2.420162                | 1.692085  | 4.019183  |
| 17            | 1             | 0           | 0.956107                | 2.431312  | 3.135849  |
| 18            | 8             | 0           | -1.363473               | 1.218534  | -1.111851 |
| 19            | 8             | 0           | -1.071111               | -1.327264 | -0.970918 |
| 20            | 8             | 0           | 1.010218                | -2.136899 | -0.775289 |
| 21            | 6             | 0           | 0.422663                | -3.465015 | -0.755830 |
| 22            | 1             | 0           | 1.252482                | -4.131355 | -0.523399 |
| 23            | 1             | 0           | 0.008704                | -3.695575 | -1.739393 |
| 24            | 1             | 0           | -0.363573               | -3.518770 | -0.001222 |
| 25            | 8             | 0           | 0.486060                | 2.475110  | -1.281524 |

|    |    |   |           |           |           |
|----|----|---|-----------|-----------|-----------|
| 26 | 6  | 0 | -0.382155 | 3.618839  | -1.451142 |
| 27 | 1  | 0 | 0.290336  | 4.471094  | -1.545371 |
| 28 | 1  | 0 | -1.038463 | 3.726543  | -0.585386 |
| 29 | 1  | 0 | -0.986785 | 3.500206  | -2.352181 |
| 30 | 13 | 0 | -2.278420 | -0.212008 | 0.041866  |
| 31 | 17 | 0 | -0.953595 | 0.653813  | 1.735965  |
| 32 | 17 | 0 | -2.955741 | -1.986775 | 1.159099  |
| 33 | 17 | 0 | -4.152395 | 0.675280  | -0.548092 |

-----  
SCF Done: E(RB+HF-LYP) = -2500.89514972 A.U. after 1 cycles  
Sum of electronic and thermal Free Energies= -2500.721835  
Thermal correction to Gibbs Free Energy= 0.173315  
After PCM corrections, the SCF energy is -2501.30158004 a.u.

B1S (AlTS5.for.log)

Standard orientation:

| Center<br>Number | Atomic<br>Number | Atomic<br>Type | Coordinates (Angstroms) |           |           |
|------------------|------------------|----------------|-------------------------|-----------|-----------|
|                  |                  |                | X                       | Y         | Z         |
| 1                | 6                | 0              | -0.342140               | 1.082706  | -0.508371 |
| 2                | 6                | 0              | 0.314097                | 0.223618  | 0.394153  |
| 3                | 6                | 0              | 1.786587                | 0.383527  | 0.674733  |
| 4                | 1                | 0              | 2.036089                | -0.248758 | 1.534242  |
| 5                | 6                | 0              | -0.437181               | -0.763189 | 1.060646  |
| 6                | 6                | 0              | 2.179056                | 1.815710  | 1.081773  |
| 7                | 8                | 0              | 1.531681                | 2.609952  | 1.707486  |
| 8                | 8                | 0              | 3.439144                | 2.082210  | 0.637851  |
| 9                | 6                | 0              | 4.007194                | 0.931837  | -0.012182 |
| 10               | 1                | 0              | 4.648414                | 0.416645  | 0.711233  |
| 11               | 1                | 0              | 4.620137                | 1.283543  | -0.844422 |
| 12               | 6                | 0              | 2.810099                | 0.071113  | -0.456404 |
| 13               | 1                | 0              | 2.417236                | 0.486646  | -1.390241 |
| 14               | 6                | 0              | 3.121257                | -1.384057 | -0.682111 |
| 15               | 6                | 0              | 4.223717                | -2.052292 | -0.346733 |
| 16               | 1                | 0              | 5.049950                | -1.558975 | 0.153850  |
| 17               | 1                | 0              | 4.337758                | -3.107527 | -0.566232 |
| 18               | 8                | 0              | -1.699214               | -0.981219 | 0.921780  |
| 19               | 8                | 0              | -1.597187               | 1.085414  | -0.794567 |
| 20               | 8                | 0              | 0.423823                | 1.973656  | -1.129562 |
| 21               | 6                | 0              | -0.213864               | 2.947502  | -1.984124 |
| 22               | 1                | 0              | 0.600485                | 3.575250  | -2.343637 |
| 23               | 1                | 0              | -0.930871               | 3.538741  | -1.411427 |
| 24               | 1                | 0              | -0.718576               | 2.451242  | -2.815447 |
| 25               | 8                | 0              | 0.219028                | -1.545331 | 1.911738  |
| 26               | 6                | 0              | -0.524805               | -2.569376 | 2.604649  |
| 27               | 1                | 0              | 0.210127                | -3.064555 | 3.238277  |
| 28               | 1                | 0              | -0.955416               | -3.274208 | 1.890579  |
| 29               | 1                | 0              | -1.316944               | -2.122909 | 3.208954  |
| 30               | 13               | 0              | -2.852080               | -0.053723 | -0.134203 |
| 31               | 17               | 0              | 1.824666                | -2.257599 | -1.518497 |
| 32               | 17               | 0              | -3.610648               | -1.293778 | -1.676671 |
| 33               | 17               | 0              | -4.273055               | 0.986861  | 1.041340  |

-----  
SCF Done: E(RB+HF-LYP) = -2501.00692115 A.U. after 1 cycles  
Sum of electronic and thermal Free Energies= -2500.830180  
Thermal correction to Gibbs Free Energy= 0.176741  
After PCM corrections, the SCF energy is -2501.39476329 a.u.

Scheme S2

A2S (AlTS8.rev.log)

Standard orientation:

| Center<br>Number | Atomic<br>Number | Atomic<br>Type | Coordinates (Angstroms) |           |           |
|------------------|------------------|----------------|-------------------------|-----------|-----------|
|                  |                  |                | X                       | Y         | Z         |
| 1                | 6                | 0              | 0.606994                | -1.257366 | -0.590672 |
| 2                | 6                | 0              | -0.342514               | -0.160121 | -0.262886 |
| 3                | 6                | 0              | -1.585875               | -0.379098 | 0.187338  |
| 4                | 1                | 0              | -2.204517               | 0.483245  | 0.410289  |
| 5                | 6                | 0              | 0.259178                | 1.228166  | -0.374591 |
| 6                | 6                | 0              | -2.116324               | -1.744894 | 0.504676  |
| 7                | 8                | 0              | -1.414965               | -2.619729 | 0.962469  |
| 8                | 8                | 0              | -3.428199               | -1.980934 | 0.299955  |
| 9                | 6                | 0              | -4.299744               | -0.999233 | -0.316242 |
| 10               | 1                | 0              | -5.068054               | -1.611798 | -0.796589 |
| 11               | 1                | 0              | -3.770959               | -0.438754 | -1.092443 |
| 12               | 6                | 0              | -4.914127               | -0.086002 | 0.713191  |
| 13               | 1                | 0              | -5.424734               | -0.573270 | 1.543894  |

|    |    |   |           |           |           |
|----|----|---|-----------|-----------|-----------|
| 14 | 6  | 0 | -4.881545 | 1.221500  | 0.634837  |
| 15 | 6  | 0 | -4.851240 | 2.523873  | 0.543248  |
| 16 | 1  | 0 | -5.624141 | 3.075202  | 0.011441  |
| 17 | 1  | 0 | -4.053738 | 3.107046  | 0.999221  |
| 18 | 8  | 0 | 1.393540  | 1.408181  | 0.277697  |
| 19 | 8  | 0 | 1.795581  | -1.263686 | -0.185443 |
| 20 | 8  | 0 | 0.147755  | -2.203499 | -1.347457 |
| 21 | 6  | 0 | 1.008053  | -3.346436 | -1.612568 |
| 22 | 1  | 0 | 1.210709  | -3.861735 | -0.672364 |
| 23 | 1  | 0 | 1.934815  | -3.008213 | -2.077514 |
| 24 | 1  | 0 | 0.429740  | -3.973121 | -2.287994 |
| 25 | 8  | 0 | -0.684706 | 2.171557  | -0.184573 |
| 26 | 6  | 0 | -0.217882 | 3.530312  | -0.117583 |
| 27 | 1  | 0 | -1.118668 | 4.136983  | -0.022173 |
| 28 | 1  | 0 | 0.314207  | 3.783191  | -1.039088 |
| 29 | 1  | 0 | 0.435084  | 3.670947  | 0.746135  |
| 30 | 13 | 0 | 2.644418  | 0.193501  | 0.666885  |
| 31 | 17 | 0 | 4.500967  | 0.478733  | -0.297333 |
| 32 | 17 | 0 | 2.691955  | -0.232768 | 2.741643  |
| 33 | 17 | 0 | 0.695368  | 1.249060  | -2.375251 |

SCF Done: E(RB+HF-LYP) = -2500.91876483 A.U. after 1 cycles  
Sum of electronic and thermal Free Energies= -2500.750615  
Thermal correction to Gibbs Free Energy= 0.168150  
After PCM corrections, the SCF energy is -2501.31015631 a.u.

TS2S (ALTS8.log)

Standard orientation:

| Center Number | Atomic Number | Atomic Type | Coordinates (Angstroms) |           |           |
|---------------|---------------|-------------|-------------------------|-----------|-----------|
|               |               |             | X                       | Y         | Z         |
| 1             | 6             | 0           | 0.023036                | -1.028932 | -0.465834 |
| 2             | 6             | 0           | -0.474034               | -0.273058 | 0.662042  |
| 3             | 6             | 0           | -1.770637               | -0.421932 | 1.155080  |
| 4             | 1             | 0           | -1.951624               | 0.076204  | 2.100684  |
| 5             | 6             | 0           | 0.382278                | 0.766506  | 1.196593  |
| 6             | 6             | 0           | -2.534591               | -1.727533 | 1.025283  |
| 7             | 8             | 0           | -2.213183               | -2.693693 | 1.671674  |
| 8             | 8             | 0           | -3.615043               | -1.729371 | 0.231036  |
| 9             | 6             | 0           | -3.846151               | -0.541510 | -0.550780 |
| 10            | 1             | 0           | -4.930726               | -0.511694 | -0.692334 |
| 11            | 1             | 0           | -3.359780               | -0.653180 | -1.523341 |
| 12            | 6             | 0           | -3.342700               | 0.696731  | 0.157282  |
| 13            | 1             | 0           | -3.769297               | 0.889730  | 1.142697  |
| 14            | 6             | 0           | -3.024095               | 1.799953  | -0.561308 |
| 15            | 6             | 0           | -3.130389               | 2.924971  | -1.210266 |
| 16            | 1             | 0           | -4.125842               | 3.337011  | -1.388238 |
| 17            | 1             | 0           | -2.267899               | 3.452446  | -1.604826 |
| 18            | 8             | 0           | 1.631989                | 0.864428  | 0.994904  |
| 19            | 8             | 0           | 1.237141                | -1.099846 | -0.825639 |
| 20            | 8             | 0           | -0.872013               | -1.741058 | -1.107970 |
| 21            | 6             | 0           | -0.436077               | -2.509843 | -2.258039 |
| 22            | 1             | 0           | 0.338881                | -3.218115 | -1.961440 |
| 23            | 1             | 0           | -0.060466               | -1.827565 | -3.022436 |
| 24            | 1             | 0           | -1.330805               | -3.029344 | -2.596206 |
| 25            | 8             | 0           | -0.194369               | 1.606153  | 2.023857  |
| 26            | 6             | 0           | 0.593698                | 2.722566  | 2.506831  |
| 27            | 1             | 0           | -0.082755               | 3.278077  | 3.154295  |
| 28            | 1             | 0           | 0.910750                | 3.328526  | 1.656255  |
| 29            | 1             | 0           | 1.459724                | 2.360540  | 3.063349  |
| 30            | 13            | 0           | 2.656906                | -0.186223 | -0.103235 |
| 31            | 17            | 0           | 3.789067                | 0.881084  | -1.515837 |
| 32            | 17            | 0           | 3.720961                | -1.542830 | 1.135186  |
| 33            | 17            | 0           | -0.322271               | 1.769855  | -1.432915 |

SCF Done: E(RB+HF-LYP) = -2500.89710798 A.U. after 1 cycles  
Sum of electronic and thermal Free Energies= -2500.726175  
Thermal correction to Gibbs Free Energy= 0.170933  
After PCM corrections, the SCF energy is -2501.29714485 a.u.

B2S (ALTS8.for.log)

Standard orientation:

| Center Number | Atomic Number | Atomic Type | Coordinates (Angstroms) |           |           |
|---------------|---------------|-------------|-------------------------|-----------|-----------|
|               |               |             | X                       | Y         | Z         |
| 1             | 6             | 0           | -0.096254               | -1.058835 | 0.222691  |
| 2             | 6             | 0           | 0.400471                | -0.069418 | -0.649488 |

|    |    |   |           |           |           |
|----|----|---|-----------|-----------|-----------|
| 3  | 6  | 0 | 1.848566  | -0.042859 | -1.096826 |
| 4  | 1  | 0 | 1.860015  | 0.486824  | -2.051060 |
| 5  | 6  | 0 | -0.488884 | 0.908483  | -1.135061 |
| 6  | 6  | 0 | 2.432363  | -1.438964 | -1.391148 |
| 7  | 8  | 0 | 2.050939  | -2.223430 | -2.217243 |
| 8  | 8  | 0 | 3.519906  | -1.668537 | -0.606379 |
| 9  | 6  | 0 | 3.675346  | -0.644074 | 0.389204  |
| 10 | 1  | 0 | 4.745435  | -0.474167 | 0.526727  |
| 11 | 1  | 0 | 3.239575  | -0.996059 | 1.327456  |
| 12 | 6  | 0 | 2.940459  | 0.592085  | -0.169982 |
| 13 | 1  | 0 | 3.640025  | 1.108085  | -0.837525 |
| 14 | 6  | 0 | 2.514738  | 1.629558  | 0.834369  |
| 15 | 6  | 0 | 2.728238  | 2.938064  | 0.701089  |
| 16 | 1  | 0 | 3.245924  | 3.315659  | -0.176025 |
| 17 | 1  | 0 | 2.399731  | 3.657393  | 1.442484  |
| 18 | 8  | 0 | -1.745454 | 1.000666  | -0.864701 |
| 19 | 8  | 0 | -1.313495 | -1.195813 | 0.617113  |
| 20 | 8  | 0 | 0.790044  | -1.934249 | 0.677170  |
| 21 | 6  | 0 | 0.324613  | -3.025134 | 1.500530  |
| 22 | 1  | 0 | -0.417370 | -3.615770 | 0.960034  |
| 23 | 1  | 0 | -0.105581 | -2.640846 | 2.427420  |
| 24 | 1  | 0 | 1.215764  | -3.618144 | 1.701274  |
| 25 | 8  | 0 | 0.018168  | 1.828980  | -1.951642 |
| 26 | 6  | 0 | -0.878420 | 2.822158  | -2.491589 |
| 27 | 1  | 0 | -0.251344 | 3.444202  | -3.129515 |
| 28 | 1  | 0 | -1.319113 | 3.415165  | -1.687571 |
| 29 | 1  | 0 | -1.669123 | 2.346353  | -3.075367 |
| 30 | 13 | 0 | -2.716036 | -0.122747 | 0.184299  |
| 31 | 17 | 0 | -3.439136 | 0.893040  | 1.897424  |
| 32 | 17 | 0 | -4.141969 | -1.178740 | -0.972398 |
| 33 | 17 | 0 | 1.684413  | 1.052741  | 2.290179  |

-----  
SCF Done: E(RB+HF-LYP) = -2501.00252569 A.U. after 1 cycles  
Sum of electronic and thermal Free Energies= -2500.825339  
Thermal correction to Gibbs Free Energy= 0.177187  
After PCM corrections, the SCF energy is -2501.39176585 a.u.

Scheme S3  
A3S (AlTS10.for.log)

Standard orientation:

| Center<br>Number | Atomic<br>Number | Atomic<br>Type | Coordinates (Angstroms) |           |           |
|------------------|------------------|----------------|-------------------------|-----------|-----------|
|                  |                  |                | X                       | Y         | Z         |
| 1                | 6                | 0              | -0.266317               | -0.701022 | -1.382620 |
| 2                | 6                | 0              | 0.742732                | 0.385598  | -1.267098 |
| 3                | 6                | 0              | 2.042240                | 0.126971  | -1.036755 |
| 4                | 1                | 0              | 2.722592                | 0.968547  | -0.944807 |
| 5                | 6                | 0              | 0.204870                | 1.771908  | -1.459391 |
| 6                | 6                | 0              | 2.680875                | -1.235706 | -1.003984 |
| 7                | 8                | 0              | 3.315933                | -1.603221 | -1.962016 |
| 8                | 8                | 0              | 2.510338                | -2.021790 | 0.072409  |
| 9                | 6                | 0              | 2.140816                | -1.455959 | 1.369000  |
| 10               | 1                | 0              | 1.830391                | -2.334710 | 1.938543  |
| 11               | 1                | 0              | 1.290345                | -0.776972 | 1.279047  |
| 12               | 6                | 0              | 3.318556                | -0.772304 | 2.008870  |
| 13               | 1                | 0              | 4.212513                | -1.378334 | 2.156390  |
| 14               | 6                | 0              | 3.295439                | 0.478019  | 2.402363  |
| 15               | 6                | 0              | 3.258153                | 1.718032  | 2.807836  |
| 16               | 1                | 0              | 2.915639                | 1.976581  | 3.807591  |
| 17               | 1                | 0              | 3.559239                | 2.539727  | 2.161340  |
| 18               | 8                | 0              | -0.902909               | 1.986180  | -1.902420 |
| 19               | 8                | 0              | -1.367628               | -0.713982 | -0.803545 |
| 20               | 8                | 0              | 0.096267                | -1.691307 | -2.151774 |
| 21               | 6                | 0              | -0.786535               | -2.848398 | -2.244318 |
| 22               | 1                | 0              | -1.717542               | -2.550059 | -2.728686 |
| 23               | 1                | 0              | -0.986815               | -3.237915 | -1.245279 |
| 24               | 1                | 0              | -0.234077               | -3.562982 | -2.850467 |
| 25               | 8                | 0              | 1.099529                | 2.711632  | -1.130428 |
| 26               | 6                | 0              | 0.647332                | 4.072775  | -1.296873 |
| 27               | 1                | 0              | 1.491488                | 4.693727  | -0.998949 |
| 28               | 1                | 0              | -0.217715               | 4.256468  | -0.656195 |
| 29               | 1                | 0              | 0.376766                | 4.256797  | -2.339028 |
| 30               | 13               | 0              | -2.288827               | -0.133350 | 0.748173  |
| 31               | 17               | 0              | -0.967979               | 1.271858  | 1.687347  |
| 32               | 17               | 0              | -4.140622               | 0.618265  | 0.051378  |
| 33               | 17               | 0              | -2.371945               | -1.989941 | 1.810349  |

-----  
SCF Done: E(RB+HF-LYP) = -2500.93843102 A.U. after 1 cycles  
Sum of electronic and thermal Free Energies= -2500.775213

Thermal correction to Gibbs Free Energy= 0.163218  
 After PCM corrections, the SCF energy is -2501.33618851 a.u.

TS3S (ALTS10.log)

Standard orientation:

| Center Number | Atomic Number | Atomic Type | Coordinates (Angstroms) |           |           |
|---------------|---------------|-------------|-------------------------|-----------|-----------|
|               |               |             | X                       | Y         | Z         |
| 1             | 6             | 0           | 0.258378                | -0.641345 | -0.541928 |
| 2             | 6             | 0           | 1.046963                | 0.534160  | -0.250290 |
| 3             | 6             | 0           | 2.506357                | 0.446158  | -0.172190 |
| 4             | 1             | 0           | 2.916893                | 1.443850  | -0.316748 |
| 5             | 6             | 0           | 0.421243                | 1.866956  | -0.491531 |
| 6             | 6             | 0           | 3.226750                | -0.512829 | -1.146533 |
| 7             | 8             | 0           | 3.202328                | -0.391393 | -2.338550 |
| 8             | 8             | 0           | 3.973782                | -1.454077 | -0.521068 |
| 9             | 6             | 0           | 3.773616                | -1.476137 | 0.893343  |
| 10            | 1             | 0           | 4.730414                | -1.730244 | 1.353329  |
| 11            | 1             | 0           | 3.028901                | -2.236639 | 1.143714  |
| 12            | 6             | 0           | 3.292718                | -0.072942 | 1.297828  |
| 13            | 1             | 0           | 4.122237                | 0.632938  | 1.391988  |
| 14            | 6             | 0           | 2.339817                | 0.020304  | 2.316223  |
| 15            | 6             | 0           | 1.119517                | 0.222540  | 2.586080  |
| 16            | 1             | 0           | 0.417312                | 0.205881  | 3.404764  |
| 17            | 1             | 0           | 0.699660                | 0.490210  | 1.501016  |
| 18            | 8             | 0           | -0.674414               | 2.054941  | -0.971578 |
| 19            | 8             | 0           | -0.982233               | -0.685313 | -0.715480 |
| 20            | 8             | 0           | 0.955735                | -1.770627 | -0.588747 |
| 21            | 6             | 0           | 0.239865                | -3.000078 | -0.892753 |
| 22            | 1             | 0           | -0.155831               | -2.945517 | -1.908411 |
| 23            | 1             | 0           | -0.574802               | -3.148726 | -0.182926 |
| 24            | 1             | 0           | 0.992910                | -3.782457 | -0.813285 |
| 25            | 8             | 0           | 1.243846                | 2.870864  | -0.098639 |
| 26            | 6             | 0           | 0.719304                | 4.197592  | -0.306228 |
| 27            | 1             | 0           | 1.487858                | 4.873423  | 0.069178  |
| 28            | 1             | 0           | -0.214962               | 4.324111  | 0.245085  |
| 29            | 1             | 0           | 0.535800                | 4.371553  | -1.369060 |
| 30            | 13            | 0           | -2.639839               | -0.283563 | 0.039621  |
| 31            | 17            | 0           | -2.219733               | 0.924991  | 1.780389  |
| 32            | 17            | 0           | -3.896466               | 0.546764  | -1.450417 |
| 33            | 17            | 0           | -3.241919               | -2.254902 | 0.675125  |

SCF Done: E(RB+HF-LYP) = -2500.89893875 A.U. after 1 cycles  
 Sum of electronic and thermal Free Energies= -2500.730431  
 Thermal correction to Gibbs Free Energy= 0.168508  
 After PCM corrections, the SCF energy is -2501.30230741 a.u.

B3S (ALTS10.rev.log)

Standard orientation:

| Center Number | Atomic Number | Atomic Type | Coordinates (Angstroms) |           |           |
|---------------|---------------|-------------|-------------------------|-----------|-----------|
|               |               |             | X                       | Y         | Z         |
| 1             | 6             | 0           | -0.190345               | -0.329139 | 0.656649  |
| 2             | 6             | 0           | -0.931006               | 0.394411  | -0.447607 |
| 3             | 6             | 0           | -2.323306               | -0.164575 | -0.820056 |
| 4             | 1             | 0           | -2.666278               | 0.471055  | -1.640535 |
| 5             | 6             | 0           | -1.004058               | 1.871783  | -0.009728 |
| 6             | 6             | 0           | -3.365773               | -0.023289 | 0.297685  |
| 7             | 8             | 0           | -3.680610               | 0.993843  | 0.857173  |
| 8             | 8             | 0           | -3.944203               | -1.220813 | 0.560287  |
| 9             | 6             | 0           | -3.270207               | -2.300450 | -0.102449 |
| 10            | 1             | 0           | -4.029380               | -2.983786 | -0.486964 |
| 11            | 1             | 0           | -2.648576               | -2.824648 | 0.627826  |
| 12            | 6             | 0           | -2.410017               | -1.665280 | -1.235605 |
| 13            | 1             | 0           | -2.979542               | -1.718554 | -2.170585 |
| 14            | 6             | 0           | -1.131097               | -2.339436 | -1.426568 |
| 15            | 6             | 0           | -0.056121               | -2.870420 | -1.575897 |
| 16            | 1             | 0           | 0.909446                | -3.312522 | -1.695081 |
| 17            | 1             | 0           | -0.292666               | 0.356185  | -1.335377 |
| 18            | 8             | 0           | -0.555305               | 2.277041  | 1.037640  |
| 19            | 8             | 0           | 1.046708                | -0.386170 | 0.750824  |
| 20            | 8             | 0           | -0.951520               | -0.866158 | 1.569518  |
| 21            | 6             | 0           | -0.308999               | -1.483171 | 2.722910  |
| 22            | 1             | 0           | 0.305728                | -0.739179 | 3.230598  |
| 23            | 1             | 0           | 0.303103                | -2.322871 | 2.390281  |
| 24            | 1             | 0           | -1.133016               | -1.813290 | 3.351997  |
| 25            | 8             | 0           | -1.588106               | 2.611791  | -0.951773 |

|    |    |   |           |           |           |
|----|----|---|-----------|-----------|-----------|
| 26 | 6  | 0 | -1.756728 | 4.009844  | -0.624219 |
| 27 | 1  | 0 | -2.204778 | 4.458994  | -1.509659 |
| 28 | 1  | 0 | -0.788143 | 4.462438  | -0.403638 |
| 29 | 1  | 0 | -2.418339 | 4.105082  | 0.239329  |
| 30 | 13 | 0 | 2.705259  | 0.003708  | -0.072117 |
| 31 | 17 | 0 | 2.255193  | 1.223599  | -1.774404 |
| 32 | 17 | 0 | 3.786443  | 0.967692  | 1.478009  |
| 33 | 17 | 0 | 3.390381  | -1.959825 | -0.577763 |

---

SCF Done: E(RB+HF-LYP) = -2500.96525170 A.U. after 1 cycles  
Sum of electronic and thermal Free Energies= -2500.793180  
Thermal correction to Gibbs Free Energy= 0.172071  
After PCM corrections, the SCF energy is -2501.36382493 a.u.
